# Supplementary material
Source: PubMed Central journal article supplement (PMC7483933)

- 1: sgCtrl
- 2: ST8SIA1-KO Sg17366
- 3: ST8SIA1-KO Sg17368

Anti-GD3 synthase  
R&D Systems  
Cat# AF6716  
350x dilution

Anti- $\beta$ -actin  
Sigma-Millipore Clone AC-74  
Cat# A2228  
5000x dilution

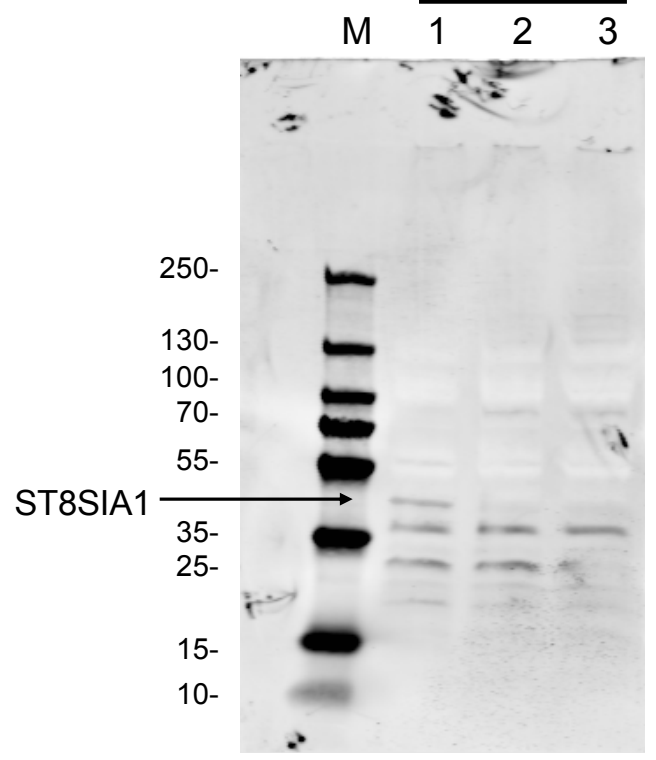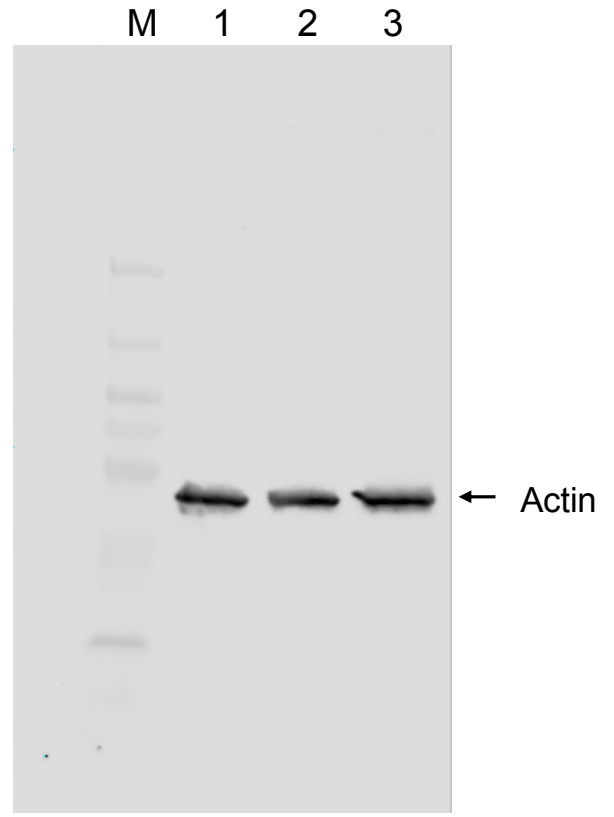

Supplement: NIHMS1587864-supplement-1587864_SourceData_ExtData_Fig5f.pdf [file NIHMS1587864-supplement-1587864_SourceData_ExtData_Fig5f.pdf]
